# Supplementary material for: Constitutional isomers of carbazole–benzoyl-pyrimidine-based thermally activated delayed fluorescence emitters for efficient OLEDs
Source: Royal Society of Chemistry journal article supplement (doi:10.1039/d1tc03998a), 2021-01-01
Supplement: d1tc03998a1.pdf [file d1tc03998a1.pdf]

**Electronic Supporting Information**

**Constitutional Isomers of Carbazole-Benzoyl-Pyrimidine-Based Thermally Activated Delayed Fluorescence Emitters for Efficient OLEDs**

Jayabalan Pandidurai,<sup>+a</sup> Jayachandran Jayakumar,<sup>+a</sup> Yi-Kuan Chen,<sup>a</sup> Chia-Min Hsieh,<sup>a</sup> and Chien-Hong Cheng<sup>\*,ab</sup>

<sup>a</sup>Department of Chemistry, National Tsing Hua University No. 101, Sec. 2, Kuang-Fu Rd., Hsinchu 30013, Taiwan

<sup>b</sup>Department of Chemistry, National Sun Yat-sen University, Kaohsiung, 80424, Taiwan

<sup>+</sup>These authors contributed equally

Email: [chcheng@mx.nthu.edu.tw](mailto:chcheng@mx.nthu.edu.tw)

Keywords: benzoyl-pyrimidine,  $\pi$ - $\pi$  interaction, TADF, carbazole, OLEDs

| <b>Table of Contents</b>                                                  | <b>Page No</b> |
|---------------------------------------------------------------------------|----------------|
| General Information                                                       | S-2            |
| TD-DFT for singlet (S <sub>1</sub> ) and triplet (T <sub>1</sub> ) states | S-3            |
| Photophysical and TRPL-properties                                         | S-9            |
| Photoelectron spectroscopy and thermal properties                         | S-13           |
| Chemical structures of the device materials                               | S-14           |
| EL-properties of the devices                                              | S-15           |
| References                                                                | S-17           |
| Spectral data of compounds                                                | S-19           |
| ORTEP Diagram and X-ray data of the emitters                              | S-23           |
| Mass spectra of the emitters                                              | S-26           |

## General Information

$^1\text{H}$  NMR and  $^{13}\text{C}$  NMR spectra were measured on a Mercury 400 spectrometer. UV-vis absorption spectra were recorded on a Hitachi U-3300 spectrophotometer. Fluorescence and Phosphorescence spectra were recorded on a Hitachi F-7000 fluorescence spectrophotometer. The absolute photoluminescence quantum efficiencies (PLQYs) of the doped films were determined using an integrating sphere under an  $\text{N}_2$  atmosphere. The thermogravimetric analysis (TGA) and differential scanning calorimetry (DSC) were performed on a thermal analyzer (2-HT, Mettler-Toledo) at a heating rate of  $10\text{ }^\circ\text{C}/\text{min}$ . from  $30\text{ }^\circ\text{C}$  to  $800\text{ }^\circ\text{C}$  under nitrogen. Transient PL decay measurements were done using an Edinburgh FLS 980 instrument. The HOMO levels of the emitters in the neat film were determined by a Riken Keiki AC-2 photoelectron spectrometer with a UV source. The X-ray diffraction was carried out on an X-ray diffractometer (X8 APEX, Bruker).

## DFT Calculation

Molecular geometry optimizations and electronic properties of these materials were carried out by using the Gaussian 09 program with density functional theory (DFT) and time-dependent DFT (TD-DFT for  $S_1$  and  $T_1$  states) calculations in which the Becke's three-parameter functional combined with Lee, Yang, and Parr's correlation functional (B3LYP) hybrid exchange-correlation functional with the 6-31G (d,p) basis set was used.<sup>1</sup> The molecular orbitals were visualized by Gaussview 5.0 software.<sup>1,2</sup> All calculations were performed in the gas phase.

## OLEDs Fabrication and Measurement

Organic materials used in device fabrication were purified by sublimation. Devices were fabricated by vacuum deposition onto pre-coated ITO glasses with a sheet resistance of  $15\ \Omega/\text{square}$  at a pressure lower than  $10^{-6}$  Torr. Organic materials were deposited at the rate of  $0.5\sim 1.2\ \text{\AA}\ \text{s}^{-1}$ . LiF and Al were deposited at the rate of  $0.1\ \text{\AA}\ \text{s}^{-1}$  and  $3\sim 10\ \text{\AA}\ \text{s}^{-1}$ , respectively. The rest of the procedures is similar to the reported method.<sup>3</sup> Current-voltage-luminance (I-V-L) characterization and electroluminescent spectra were measured and recorded by using a programmable source meter (2400, Keithley) and a spectroradiometer (CS2000A, Konica Minolta). External quantum efficiencies and power efficiencies were determined by the Lambertian emission device assumption.

**Table S1.** Singlet and triplet excitation states, and transition configurations of the 35CzBPym by TD-DFT at the B3LYP/6-31G (d,p).

| State                            | Excitation    | $E_{\text{cal}}$ (eV) <sup>a</sup>    | $\lambda_{\text{cal}}$ (nm) <sup>b</sup> | $f^{\text{c}}$ |        |
|----------------------------------|---------------|---------------------------------------|------------------------------------------|----------------|--------|
| Singlet Excited States           |               |                                       |                                          |                |        |
| S <sub>1</sub>                   | HOMO-1 → LUMO | -0.21432                              | 2.6258                                   | 472            | 0.0090 |
|                                  | HOMO → LUMO   | 0.67011                               |                                          |                |        |
| S <sub>2</sub>                   | HOMO-1 → LUMO | 0.67097                               | 2.6739                                   | 463            | 0.0054 |
|                                  | HOMO → LUMO   | 0.21443                               |                                          |                |        |
| S <sub>3</sub>                   | HOMO-2 → LUMO | 0.70505                               | 3.0049                                   | 412            | 0.0000 |
| S <sub>4</sub>                   | HOMO-3 → LUMO | 0.70592                               | 3.0342                                   | 408            | 0.0001 |
| Triplet Excited States           |               |                                       |                                          |                |        |
| T <sub>1</sub>                   | HOMO-1 → LUMO | -0.27494                              | 2.5055                                   | 494            | -      |
|                                  | HOMO → LUMO   | 0.63232                               |                                          |                |        |
| T <sub>2</sub>                   | HOMO-1 → LUMO | 0.62485                               | 2.5626                                   | 483            | -      |
|                                  | HOMO → LUMO   | 0.26538                               |                                          |                |        |
| T <sub>3</sub>                   | HOMO-7 → LUMO | 0.65404                               | 2.9219                                   | 424            | -      |
| T <sub>4</sub>                   | HOMO-2 → LUMO | 0.7029                                | 3.0035                                   | 412            | -      |
| $S_1-T_1 = \Delta E_{\text{ST}}$ |               | $2.6258 - 2.5055 = 0.1203 \text{ eV}$ |                                          |                |        |

<sup>a</sup>Excitation energy; <sup>b</sup>excitation wavelength ( $\lambda$ ); <sup>c</sup>oscillator strength ( $f$ ).

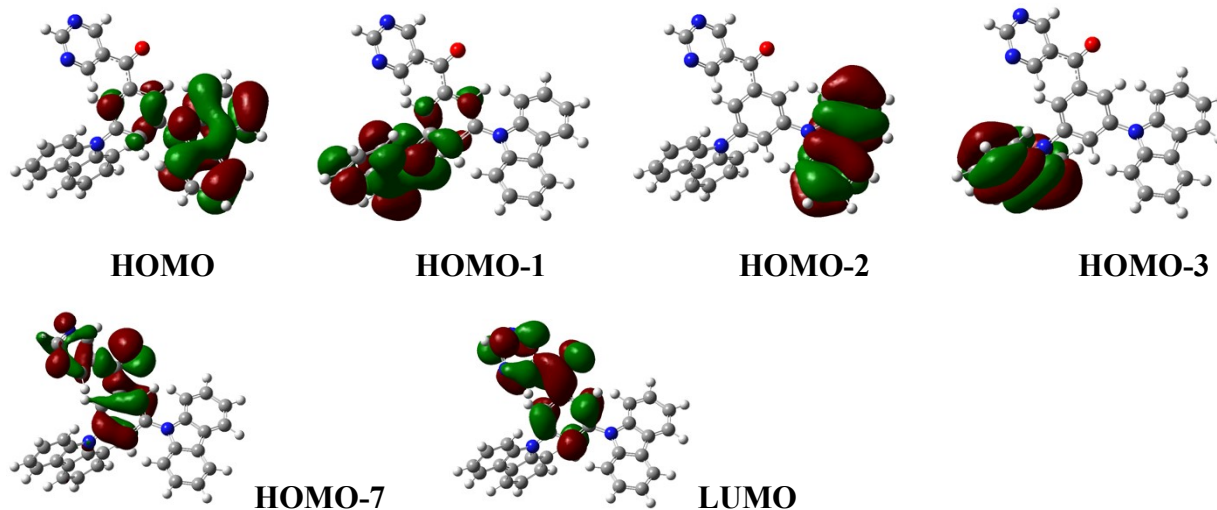

**Table S2.** Singlet and triplet excitation states, and transition configurations of the 35tCzBPym by TD-DFT at the B3LYP/6-31G (d,p).

| State                                                   | Excitation                                      | $E_{\text{cal}}$ (eV) <sup>a</sup> | $\lambda_{\text{cal}}$ (nm) <sup>b</sup> | $f^{\text{c}}$ |        |
|---------------------------------------------------------|-------------------------------------------------|------------------------------------|------------------------------------------|----------------|--------|
| Singlet Excited States                                  |                                                 |                                    |                                          |                |        |
| S <sub>1</sub>                                          | HOMO → LUMO                                     | 0.70353                            | 2.4703                                   | 501            | 0.0161 |
| S <sub>2</sub>                                          | HOMO-1 → LUMO                                   | 0.70345                            | 2.5961                                   | 477            | 0.0051 |
| S <sub>3</sub>                                          | HOMO-3 → LUMO                                   | 0.70592                            | 2.8964                                   | 428            | 0.0002 |
| S <sub>4</sub>                                          | HOMO-2 → LUMO                                   | 0.70504                            | 3.4853                                   | 427            | 0.0000 |
| Triplet Excited States                                  |                                                 |                                    |                                          |                |        |
| T <sub>1</sub>                                          | HOMO → LUMO                                     | 0.69111                            | 2.3599                                   | 525            | -      |
| T <sub>2</sub>                                          | HOMO-11 → LUMO<br>HOMO-1 → LUMO                 | -0.10550<br>0.68484                | 2.4281                                   | 494            | -      |
| T <sub>3</sub>                                          | HOMO-7 → LUMO<br>HOMO-3 → LUMO<br>HOMO-2 → LUMO | -0.22924<br>0.64705<br>-0.12095    | 2.9208<br>3.0035                         | 428            | -      |
| T <sub>4</sub>                                          | HOMO-3 → LUMO<br>HOMO-2 → LUMO                  | 0.13478<br>0.68929                 | 2.9162                                   | 425            | -      |
| S <sub>1</sub> -T <sub>1</sub> = $\Delta E_{\text{ST}}$ |                                                 | 2.4703 – 2.3599 = 0.110 eV         |                                          |                |        |

<sup>a</sup>Excitation energy; <sup>b</sup>excitation wavelength ( $\lambda$ ); <sup>c</sup>oscillator strength ( $f$ ).

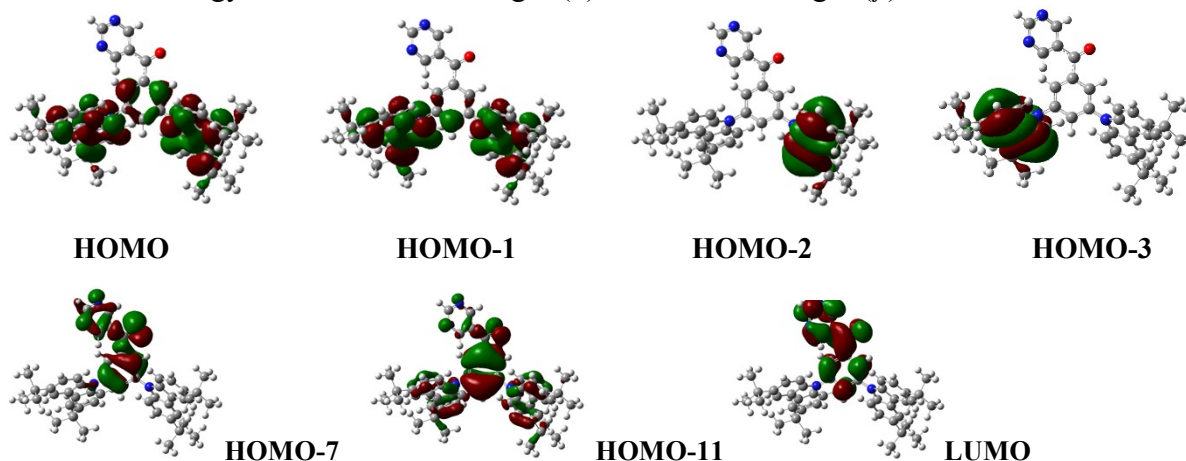

**Table S3.** Singlet and triplet excitation states, and transition configurations of the 25CzBPym by TD-DFT at the B3LYP/6-31G (d,p).

| State                                                   | Excitation    | $E_{\text{cal}}$ (eV) <sup>a</sup> | $\lambda_{\text{cal}}$ (nm) <sup>b</sup> | $f^{\text{c}}$ |        |
|---------------------------------------------------------|---------------|------------------------------------|------------------------------------------|----------------|--------|
| Singlet Excited States                                  |               |                                    |                                          |                |        |
| S <sub>1</sub>                                          | HOMO-1 → LUMO | -0.20549                           | 2.6259                                   | 472            | 0.0210 |
|                                                         | HOMO → LUMO   | 0.67332                            |                                          |                |        |
| S <sub>2</sub>                                          | HOMO-1 → LUMO | 0.67233                            | 2.9200                                   | 424            | 0.0004 |
|                                                         | HOMO → LUMO   | 0.20549                            |                                          |                |        |
| S <sub>3</sub>                                          | HOMO-3 → LUMO | 0.70550                            | 3.0813                                   | 402            | 0.0031 |
| S <sub>4</sub>                                          | HOMO-2 → LUMO | 0.70512                            | 3.2000                                   | 387            | 0.0000 |
| Triplet Excited States                                  |               |                                    |                                          |                |        |
| T <sub>1</sub>                                          | HOMO-7 → LUMO | -0.10504                           | 2.4991                                   | 496            | -      |
|                                                         | HOMO-1 → LUMO | -0.18314                           |                                          |                |        |
|                                                         | HOMO → LUMO   | 0.65611                            |                                          |                |        |
|                                                         | HOMO → LUMO+2 | 0.10232                            |                                          |                |        |
| T <sub>2</sub>                                          | HOMO-1 → LUMO | 0.66537                            | 2.8637                                   | 432            | -      |
|                                                         | HOMO → LUMO   | 0.18097                            |                                          |                |        |
| T <sub>3</sub>                                          | HOMO-7 → LUMO | 0.64789                            | 3.0081                                   | 412            | -      |
| T <sub>4</sub>                                          | HOMO-3 → LUMO | 0.70110                            | 3.0604                                   | 405            | -      |
| S <sub>1</sub> -T <sub>1</sub> = $\Delta E_{\text{ST}}$ |               | 2.6259 – 2.4991 = 0.126 eV         |                                          |                |        |

<sup>a</sup>Excitation energy; <sup>b</sup>excitation wavelength ( $\lambda$ ); <sup>c</sup>oscillator strength ( $f$ ).

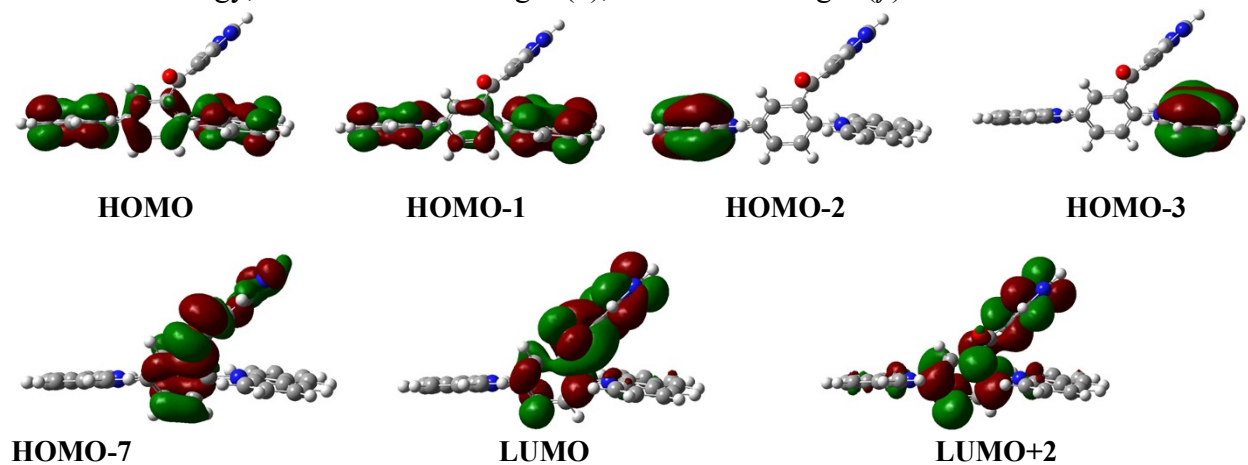

**Table S4.** Singlet and triplet excitation states, and transition configurations of the 25tCzBPym by TD-DFT at the B3LYP/6-31G (d,p).

| State                              | Excitation                                      | $E_{\text{cal}}$ (eV) <sup>a</sup>    | $\lambda_{\text{cal}}$ (nm) <sup>b</sup> | $f^{\text{c}}$ |        |
|------------------------------------|-------------------------------------------------|---------------------------------------|------------------------------------------|----------------|--------|
| Singlet Excited States             |                                                 |                                       |                                          |                |        |
| S <sub>1</sub>                     | HOMO → LUMO                                     | 0.66554                               | 2.5121                                   | 494            | 0.0324 |
| S <sub>2</sub>                     | HOMO-1 → LUMO                                   | 0.66258                               | 2.7759                                   | 467            | 0.0055 |
| S <sub>3</sub>                     | HOMO-3 → LUMO                                   | 0.70572                               | 2.9915                                   | 414            | 0.0060 |
| S <sub>4</sub>                     | HOMO-2 → LUMO                                   | 0.70520                               | 3.0777                                   | 403            | 0.0000 |
| Triplet Excited States             |                                                 |                                       |                                          |                |        |
| T <sub>1</sub>                     | HOMO → LUMO<br>HOMO-1 → LUMO                    | 0.66023<br>-0.20568                   | 2.4075                                   | 515            | -      |
| T <sub>2</sub>                     | HOMO-7 → LUMO<br>HOMO-1 → LUMO<br>HOMO → LUMO   | 0.17053<br>0.64344<br>0.20025         | 2.6982                                   | 460            | -      |
| T <sub>3</sub>                     | HOMO-3 → LUMO                                   | 0.69980                               | 2.9656                                   | 418            | -      |
| T <sub>4</sub>                     | HOMO-7 → LUMO<br>HOMO-1 → LUMO<br>HOMO → LUMO+2 | 0.62094<br>-0.16335<br>-0.10496       | 3.0008                                   | 413            | -      |
| $S_1 - T_1 = \Delta E_{\text{ST}}$ |                                                 | $2.5121 - 2.4075 = 0.1046 \text{ eV}$ |                                          |                |        |

<sup>a</sup>Excitation energy; <sup>b</sup>excitation wavelength ( $\lambda$ ); <sup>c</sup>oscillator strength ( $f$ ).

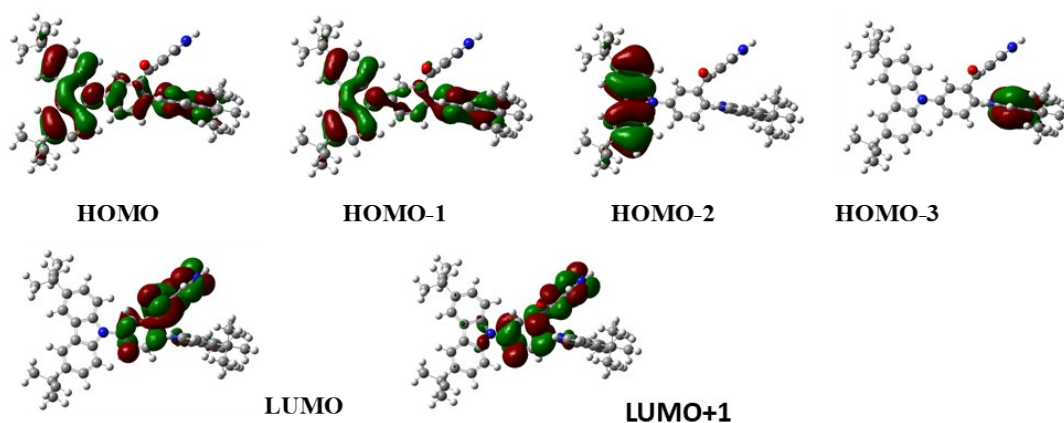

**Table S5.** Natural transition orbitals in the first singlet excitation states of the emitter.

| Emitter   | Holes ( $S_1$ )                                                                     | Particles ( $S_1$ )                                                                  |
|-----------|-------------------------------------------------------------------------------------|--------------------------------------------------------------------------------------|
| 25CzBPym  | 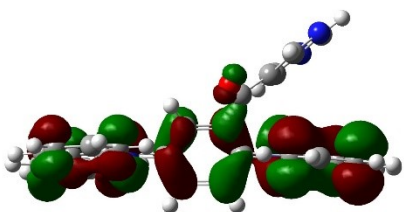   |    |
| 35CzBPym  |   |   |
| 25tCzBPym |  |  |
| 35tCzBPym |  |  |

**Table S6.** Natural transition orbitals in the first triplet excitation states of the emitter.

| Emitter   | Holes ( $T_1$ )                                                                     | Particles ( $T_1$ )                                                                  |
|-----------|-------------------------------------------------------------------------------------|--------------------------------------------------------------------------------------|
| 25CzBPym  | 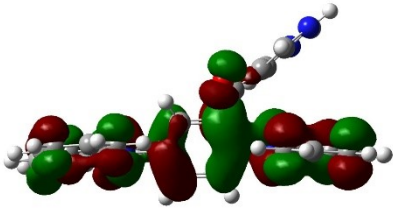   |    |
| 35CzBPym  |   |   |
| 25tCzBPym |  |  |
| 35tCzBPym |  |  |



## Photophysical properties

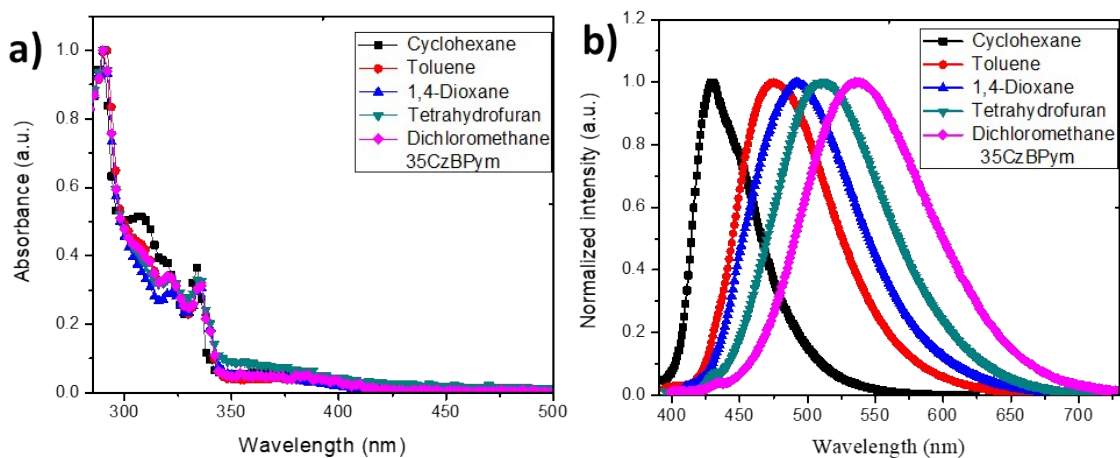

**Fig S1.** a) Absorbance and b) fluorescence spectra of 35CzBPym in various solvents at RT ( $10^{-5}$  M).

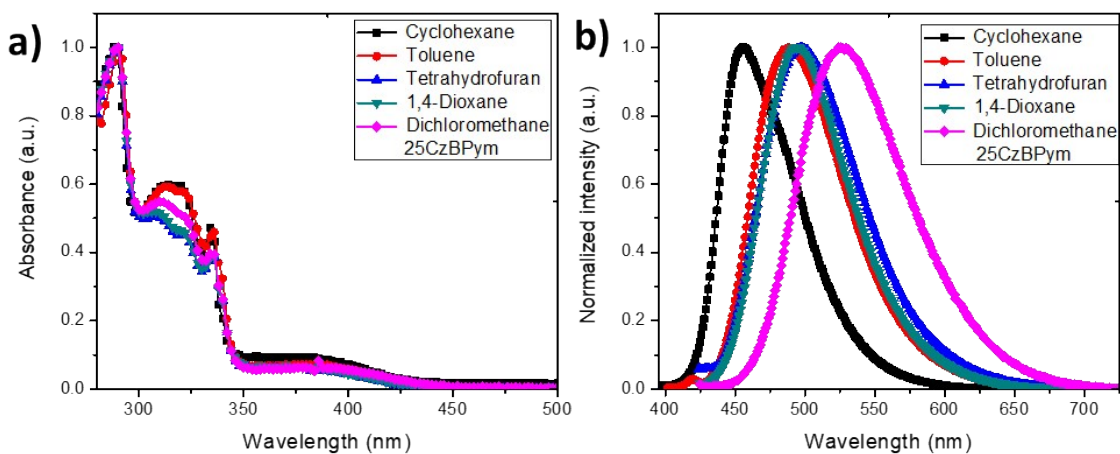

**Fig S2.** a) Absorbance and b) fluorescence spectra of 25CzBPym in various solvents at RT ( $10^{-5}$  M).

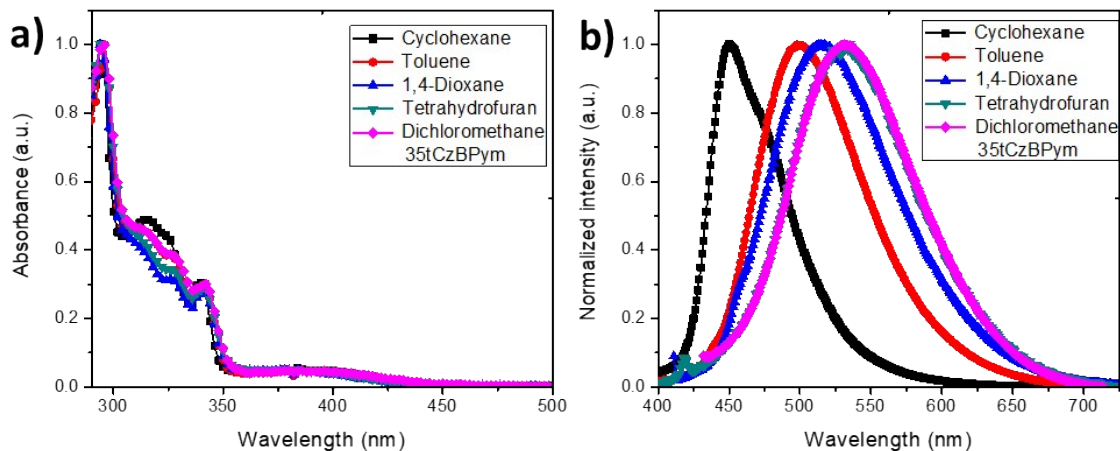

**Fig S3.** a) Absorbance and b) fluorescence spectra of 35tCzBPym in various solvents at RT ( $10^{-5}$  M).

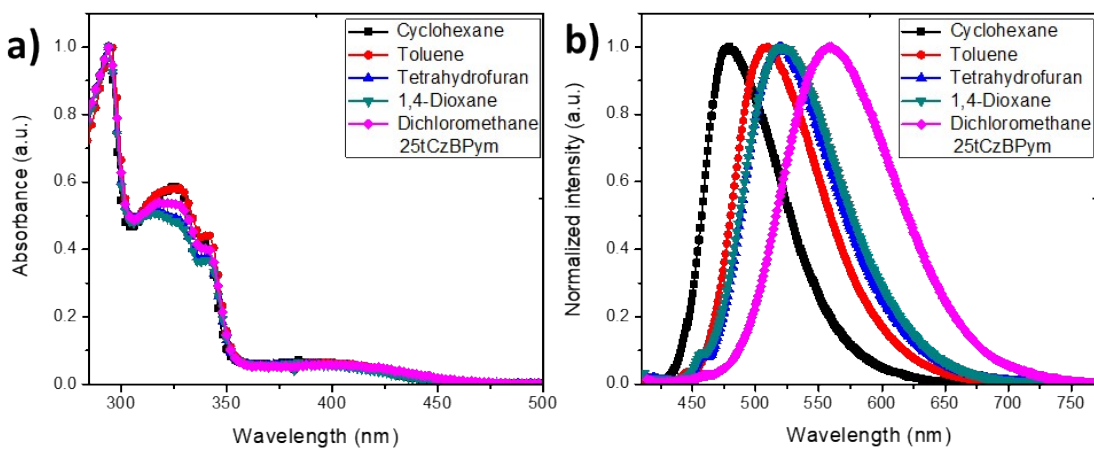

**g S4.** a) Absorbance and b) fluorescence spectra of 25tCzBPym in various solvents at RT ( $10^{-5}$  M).

**Fi**

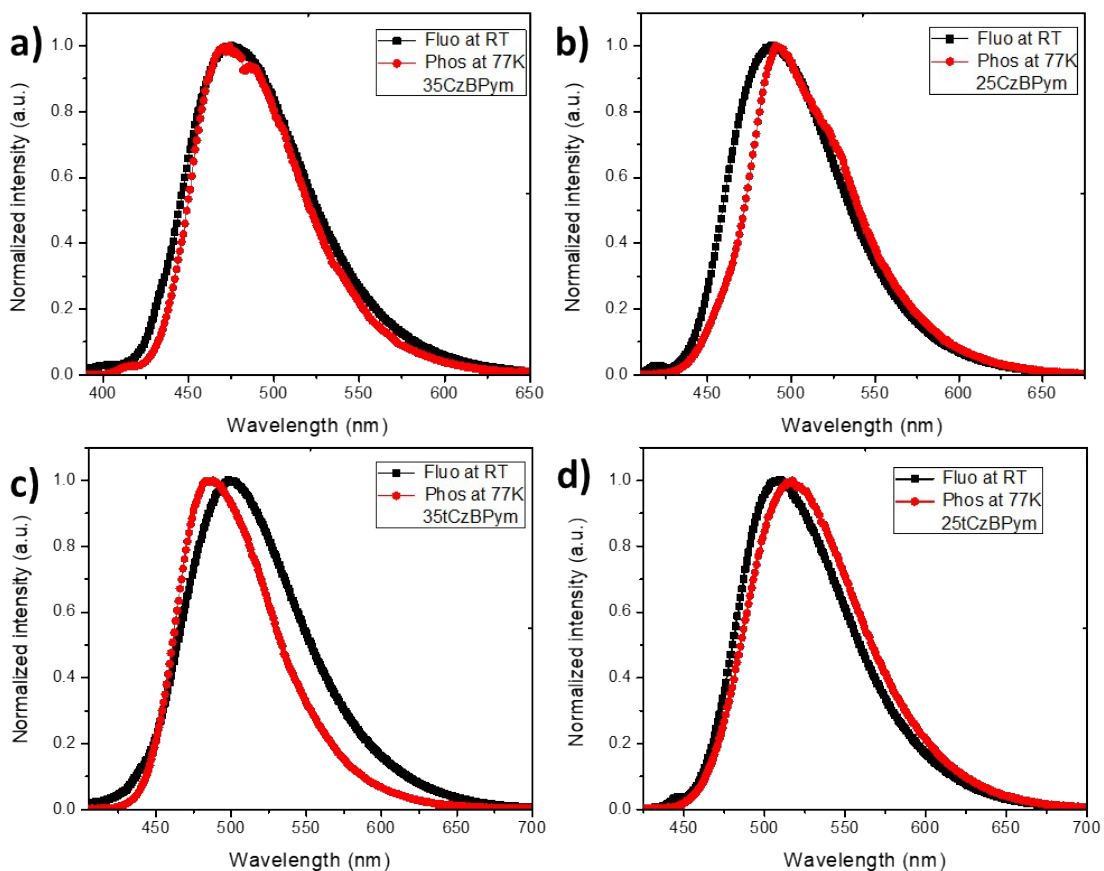

**Fig S5.** Fluorescence (Fluo.) spectra of a) 35CzBPym, b) 25CzBPym, c) 35tCzBPym, and d) 25tCzBPym in toluene ( $10^{-5}$  M) solution at room temperature and phosphorescence (Phos.) spectra in toluene ( $10^{-5}$  M) at 77 K.

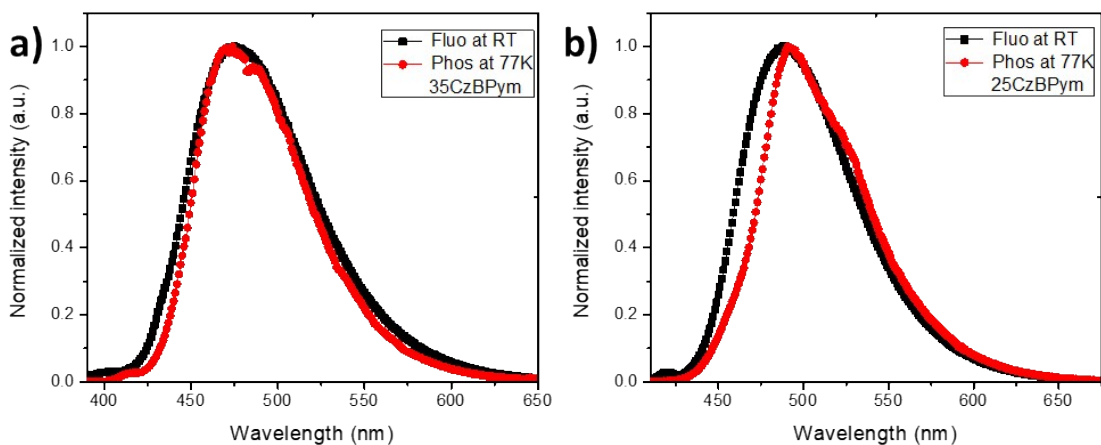

**Fig S6.** Fluorescence (Fluo.) and phosphorescence spectra of a) 35CzBPym and b) 25CzBPym doped in mCBP thin films (7 wt%).

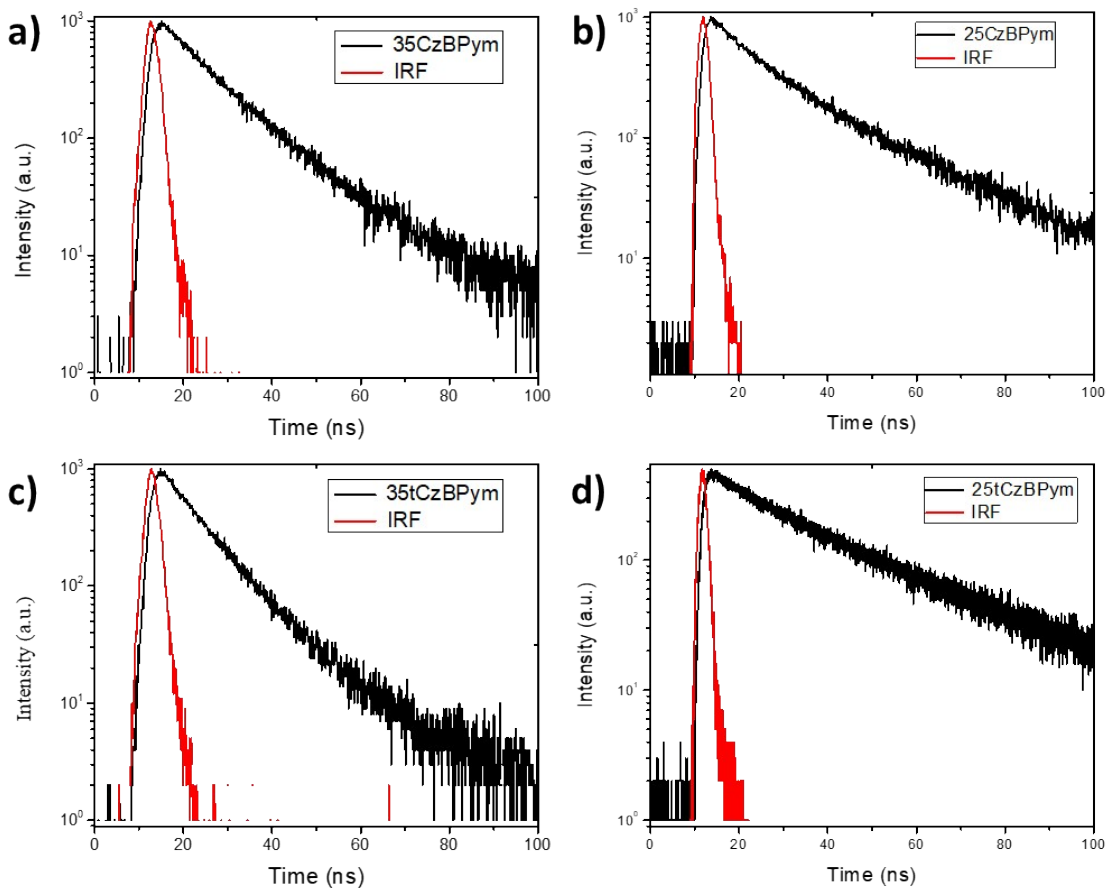

**Fig S7.** Prompt fluorescence spectra of a) 35CzBPym, b) 25CzBPym, c) 35tCzBPym, and d) 25tCzBPym doped in mCBP thin films (7 wt%) at 300 K.

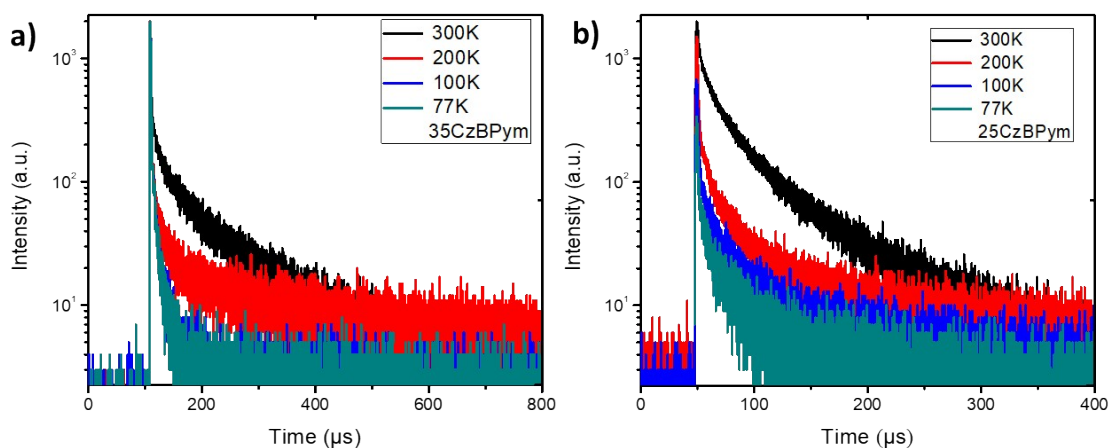

**Fig S8.** The transient PL decay curves of 7 wt% a) 35CzBPym and b) 25CzBPym doped in mCBP thin films at various temperatures.

### Photoelectron spectroscopy and Thermal properties

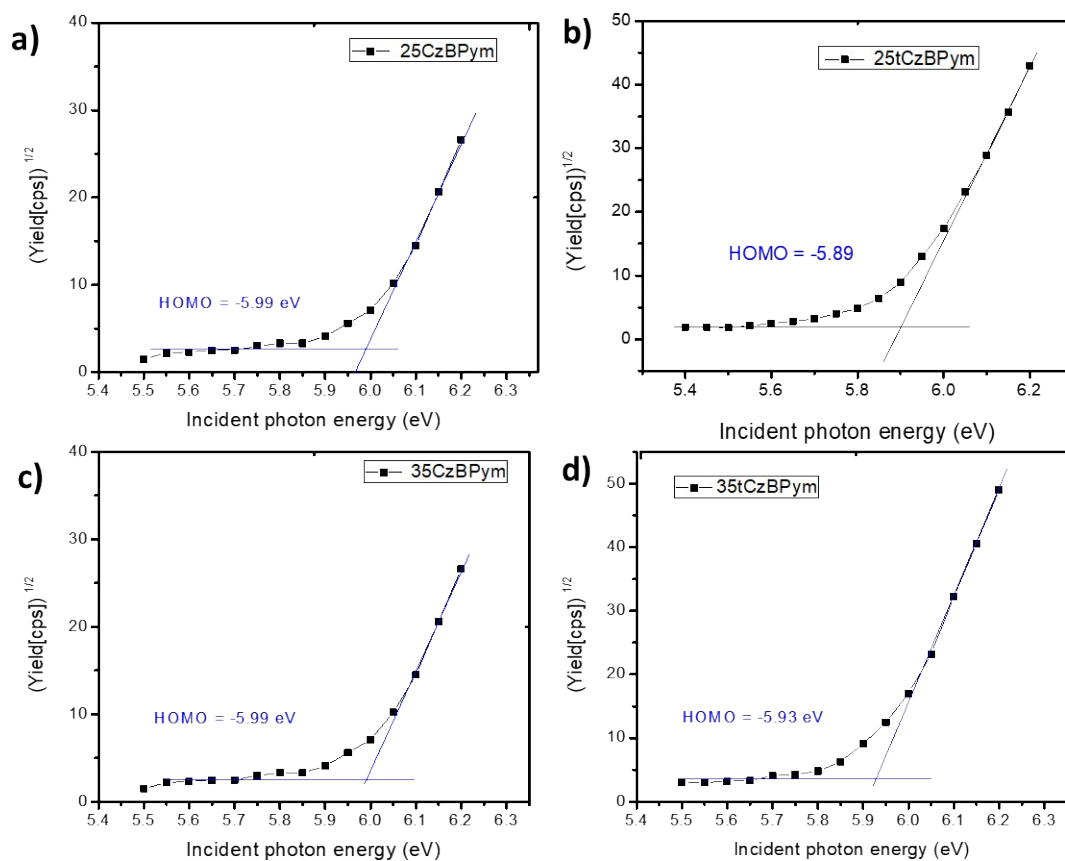

**Fig S9.** Photoelectron spectroscopy a) of 25CzBPym, b) 25tCzBPym, c) 35CzBPym, and d) 35tCzBPym measured in neat films.

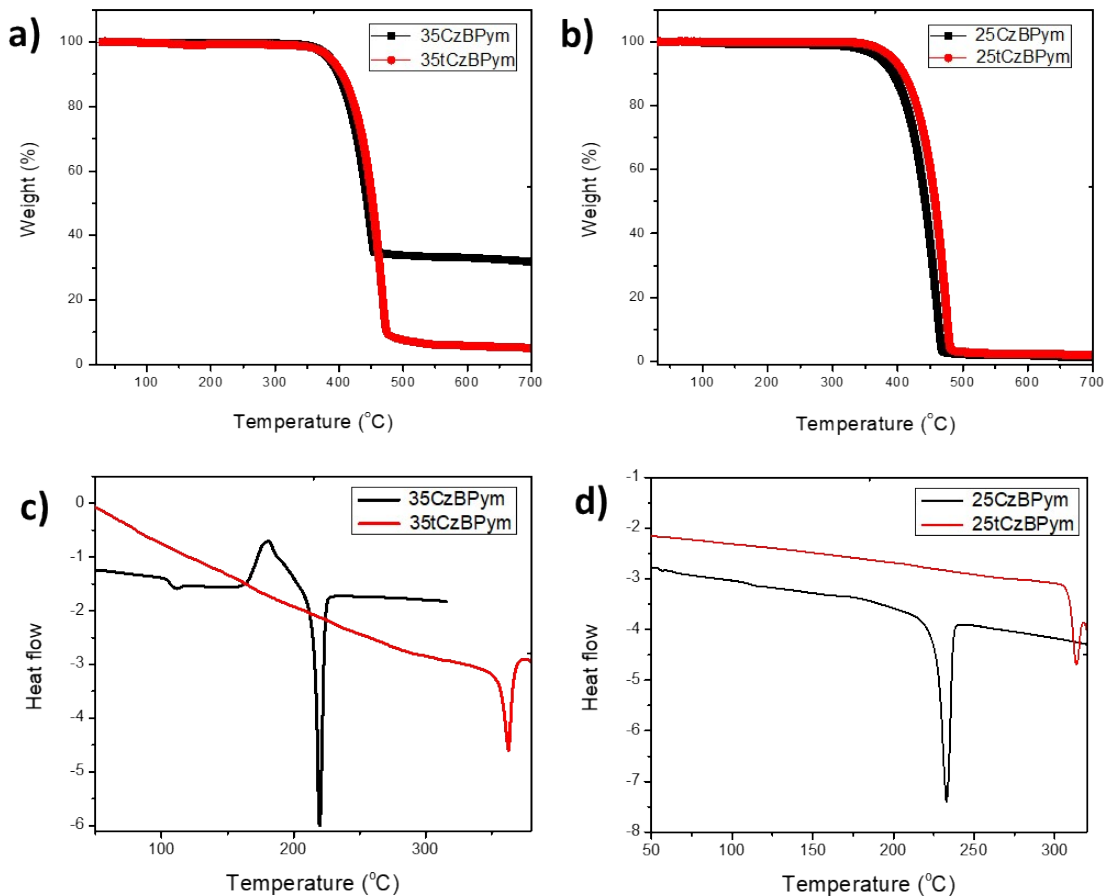

**Fig S10.** The thermogravimetric analysis (TGA) of (a) 35CzBPym and 35tCzBPym and (b) 25CzBPym and 25tCzBPym. The differential scanning calorimetry (DSC) of (c) 35CzBPym and 35tCzBPym and (d) 25CzBPym and 25tCzBPym.

## EL-properties of the devices

### Chemical structures of the device materials

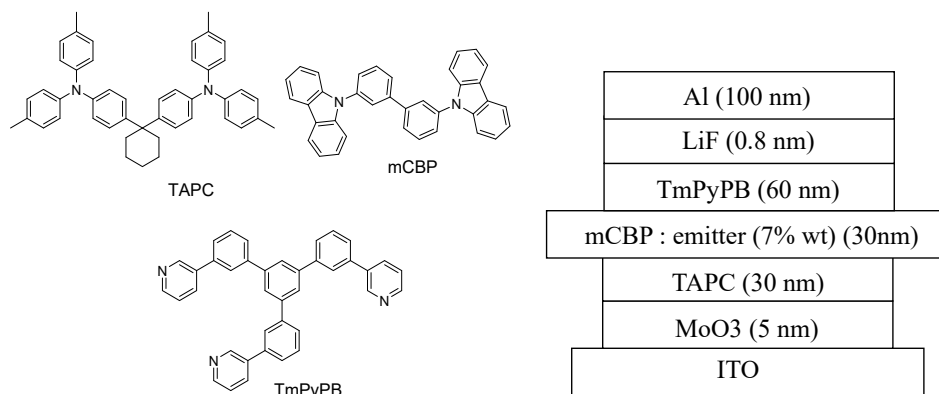

**Fig S11.** Structures of the materials used in the devices and schematic representation of the device

**Table S7.** Summarized doped-device optimization of emitters with different host matrix.

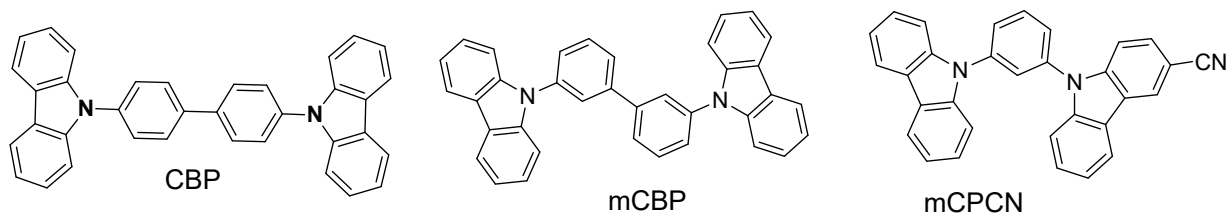

| H1: ITO /MoO <sub>3</sub> (5)/TAPC (30)/CBP: 25tCzBPym (7 wt%) (30)/TmPyPB (60)/LiF (0.8)/Al (100)                                                                                                                                                                                                                                                                              |                       |                                  |                                      |                      |                                    |                             |
|---------------------------------------------------------------------------------------------------------------------------------------------------------------------------------------------------------------------------------------------------------------------------------------------------------------------------------------------------------------------------------|-----------------------|----------------------------------|--------------------------------------|----------------------|------------------------------------|-----------------------------|
| H2: ITO /MoO <sub>3</sub> (5)/TAPC (30)/mCBP: 25tCzBPym (7 wt%) (30)/TmPyPB (60)/LiF (0.8)/Al (100)                                                                                                                                                                                                                                                                             |                       |                                  |                                      |                      |                                    |                             |
| H3: ITO /MoO <sub>3</sub> (5)/TAPC (30)/mCPCN: 25tCzBPym (7 wt%) (30)/TmPyPB (60)/LiF (0.8)/Al (100)                                                                                                                                                                                                                                                                            |                       |                                  |                                      |                      |                                    |                             |
| Anode: ITO Cathode: Al (100) (unit:nm)                                                                                                                                                                                                                                                                                                                                          |                       |                                  |                                      |                      |                                    |                             |
| Device                                                                                                                                                                                                                                                                                                                                                                          | PLQY (%) <sup>a</sup> | V <sub>on</sub> (V) <sup>b</sup> | L (cd m <sup>-2</sup> ) <sup>c</sup> | EQE (%) <sup>d</sup> | λ <sub>max</sub> (nm) <sup>e</sup> | CIE <sub>(x,y)</sub> at 8 V |
| H1                                                                                                                                                                                                                                                                                                                                                                              | 60                    | 3.5                              | 12502                                | 15.9                 | 492                                | (0.19, 0.38)                |
| H2                                                                                                                                                                                                                                                                                                                                                                              | 88                    | 3.7                              | 32077                                | 23.3                 | 500                                | (0.20, 0.47)                |
| H3                                                                                                                                                                                                                                                                                                                                                                              | 80                    | 4.0                              | 14093                                | 20.1                 | 504                                | (0.21, 0.48)                |
| <sup>a</sup> PLQY, photoluminescence quantum yield of a 7 wt% BPym emitter doped film; <sup>b</sup> V <sub>on</sub> , the operating voltage at a brightness of 1 cd m <sup>-2</sup> ; <sup>c</sup> L, maximum luminance; <sup>d</sup> EQE, maximum external quantum efficiency; <sup>e</sup> λ <sub>max</sub> , the wavelength of the EL spectrum with maximum intensity at 8 V |                       |                                  |                                      |                      |                                    |                             |

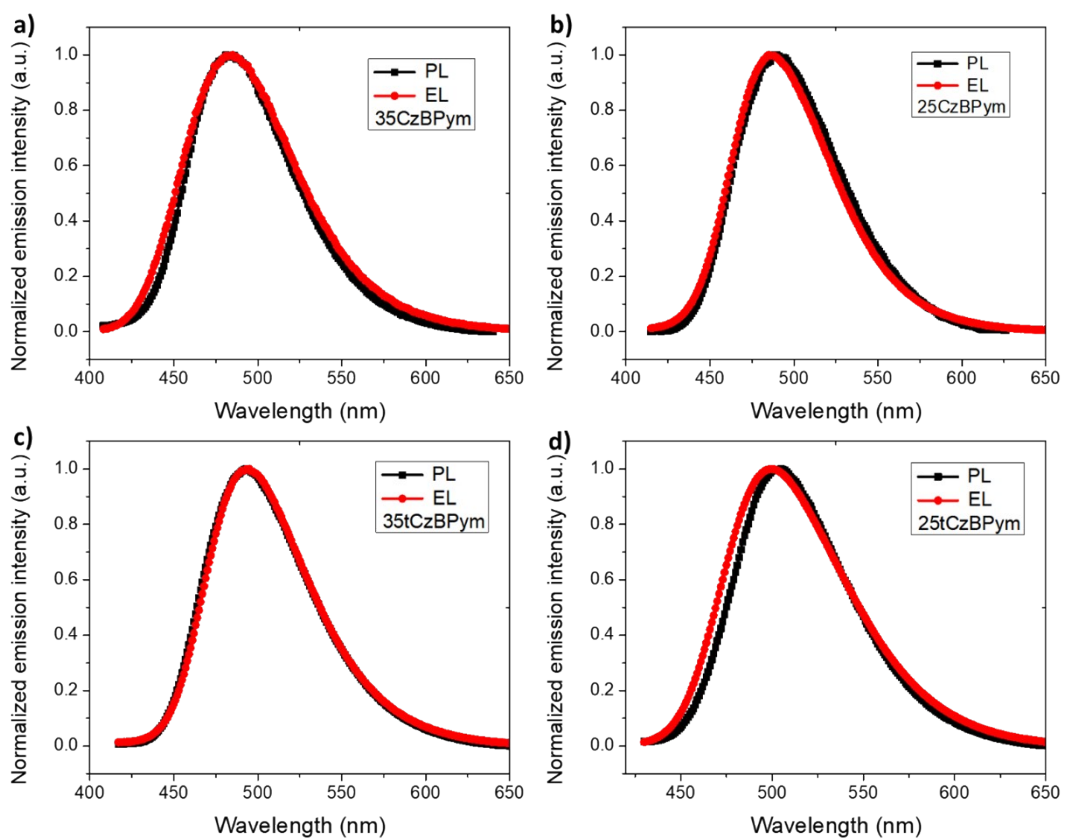

**Fig S12.** Comparison of PL and EL-characteristics of emitters in doped thin-films (a-d)

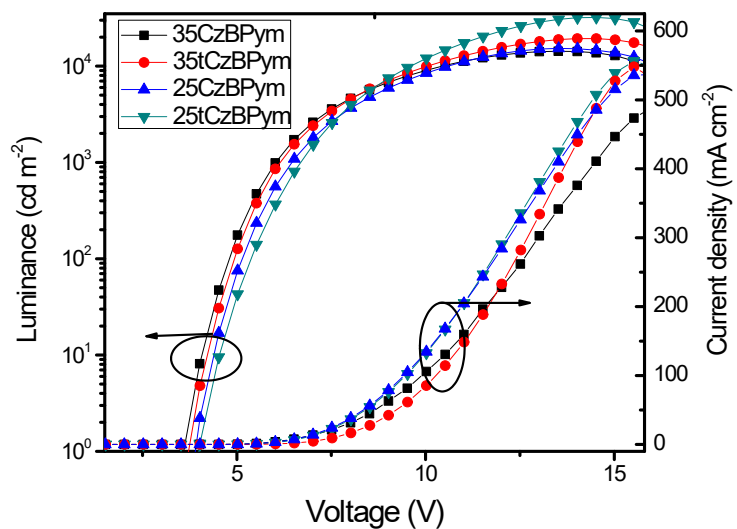

**Fig S13.** a) Luminance-voltage-current efficiency of 35CzBPym, 35tCzBPym, 25CzBPym, and 25tCzBPym -based devices.



**Table S8.** EL performances of representative blue to green pyrimidine-based TADF OLEDs.<sup>a</sup>

| Entry    | Blue-green Emitter | $L_{\max}$ (cd m <sup>-2</sup> ) | EQE <sub>max</sub> (%) | EQE (%) at 1,000 cd m <sup>-2</sup> | CIE (x, y)          | EL <sub>max</sub> (nm) | Ref.             |
|----------|--------------------|----------------------------------|------------------------|-------------------------------------|---------------------|------------------------|------------------|
| <b>1</b> | <b>35CzBPym</b>    | <b>14286</b>                     | <b>13.5</b>            | <b>9.1</b>                          | <b>(0.16, 0.30)</b> | <b>482</b>             | <b>This work</b> |
| <b>2</b> | <b>25CzBPym</b>    | <b>15278</b>                     | <b>15.3</b>            | <b>8.7</b>                          | <b>(0.15, 0.34)</b> | <b>486</b>             |                  |
| <b>3</b> | <b>35tCzBPym</b>   | <b>19314</b>                     | <b>19.1</b>            | <b>9.7</b>                          | <b>(0.17, 0.42)</b> | <b>494</b>             |                  |
| <b>4</b> | <b>25tCzBPym</b>   | <b>32077</b>                     | <b>23.3</b>            | <b>13.6</b>                         | <b>(0.20, 0.47)</b> | <b>500</b>             |                  |
| 5        | 6,7-DCQx-Ca        | -                                | 21.5                   | -                                   | (0.37, 0.57)        | 541                    | 4a               |
| 6        | CzPCN              | 13100                            | 12.8                   | -                                   | (0.20, 0.36)        | 494                    | 4a               |
| 7        | tCzPCN             | 13200                            | 5.1                    | -                                   | (0.19, 0.35)        | 490                    | 4a               |
| 8        | MeOCzPCN           | 9300                             | 1.4                    | -                                   | (0.30, 0.49)        | 524                    | 4a               |
| 9        | 2PyCNICz           | -                                | 17.1                   | -                                   | (0.31, 0.57)        | -                      | 4b               |
| 10       | 2PyCNBCz           | -                                | 14.5                   | -                                   | (0.34, 0.58)        | -                      | 4b               |
| 11       | Ac-HPM             | -                                | 20.9                   | 11.7                                | (0.21, 0.44)        | -                      | 4c               |
| 12       | Ac-PPM             | -                                | 19.0                   | 11.2                                | (0.21, 0.44)        | -                      | 4c               |
| 13       | Ac-MPM             | -                                | 24.5                   | 10.1                                | (0.19, 0.37)        | -                      | 4c               |
| 14       | MFAc-PPM           | -                                | 20.4                   | -                                   | (0.16, 0.23)        | 470                    | 4d               |
| 15       | MXAc-PPM           | -                                | 12.2                   | -                                   | (0.16, 0.20)        | 462                    | 4d               |
| 16       | MFAc-PM            | -                                | 17.1                   | -                                   | (0.16, 0.21)        | 469                    | 4d               |
| 17       | MXAc-PM            | -                                | 14.3                   | -                                   | (0.16, 0.19)        | 460                    | 4d               |
| 18       | Ac-PM              | -                                | 11.4                   | -                                   | (0.15, 0.15)        | 458                    | 4d               |
| 19       | PXZPM              | -                                | 19.9                   | 14.2                                | (0.33, 0.57)        | -                      | 4e               |
| 20       | PXZMePM            | -                                | 22.2                   | 15.4                                | (0.30, 0.56)        | -                      | 4e               |
| 21       | PXZPhPM            | -                                | 24.6                   | 18.2                                | (0.32, 0.57)        | -                      | 4e               |
| 22       | Ac-1MHPM           | -                                | 24.0                   | 11.2                                | (0.17, 0.28)        | -                      | 4f               |
| 23       | Ac-2MHPM           | -                                | 19.8                   | 9.6                                 | (0.17, 0.27)        | -                      | 4f               |
| 24       | Ac-3MHPM           | -                                | 17.8                   | -                                   | (0.16, 0.15)        | -                      | 4f               |
| 25       | Pm2                | -                                | 31.3                   | -                                   | (0.32, 0.59)        | -                      | 4g               |
| 26       | Pm5                | -                                | 30.6                   | -                                   | (0.32, 0.57)        | -                      | 4g               |
| 27       | Ac-46DPPM          | -                                | 11.8                   | -                                   | (0.16, 0.21)        | -                      | 4h               |
| 28       | PXZ-PYR            | 4214                             | 27.9                   | 12.3                                | (0.35, 0.56)        | 536                    | 4i               |

|    |                |       |      |      |             |     |    |
|----|----------------|-------|------|------|-------------|-----|----|
| 29 | PXZ- $\mu$ PXR | 22730 | 29.1 | 20.5 | (0.32,0.55) | 529 | 4i |
| 30 | PXZ-mdPYR      | 7762  | 27.5 | 16.5 | (0.29,0.49) | 514 | 4i |
| 31 | PXZ-2mPYR      | 12476 | 26.3 | 8.9  | (0.23,0.42) | 502 | 4i |

<sup>a</sup> The results were obtained from reference.

## References

- 1 C. Adamo and V. Barone, *J. Chem. Phys.*, 1999, **110**, 6158-6170.
- 2 a). M. Ernzerhof and G. E. Scuseria, *J. Chem. Phys.*, 1999, **110**, 5029-5036. b) Frisch, M. J. Gaussian 09, revision D.01; Gaussian, Inc.: Wallingford, CT, 2013.
- 3 I. S. Park, S. Y. Lee, C. Adachi and T. Yasuda, *Adv. Funct. Mater.*, 2016, **26**, 1813-1821.
- 4 a) U. Tsiko, O. Bezikonnyi, G. Sych R. Keruckiene, D. Volyniuk, J. Simokaitiene, I. Danyliv, Y. Danyliv, A. Bucinskas, X. Tan, and J. VidasGrazulevicius. *Journal of Advanced Research* 2021, **33**, 41–51; b) J. S. Jang, H. L. Lee, J. Y. Lee, *J. Mater. Chem. C*, 2019, **7**, 12695-12703; c) R. Komatsu, H. Sasabe, Y. Seino, K. Nakao and J. Kido, *J. Mater. Chem. C*, 2016, **4**, 2274–2278; d) I. S. Park., H. Komiwamaa and T. Yasuda, *Chem. Sci.*, 2017, **8**, 953–960; e) K. Wu, T. Zhang, L. Zhan, C. Zhong, S. Gong, N. Jiang, Z. H. Lu and C. Yang, *Chem. – Eur. J.*, 2016, **22**, 10860–10866; f) R. Komatsu, T. Ohsawa, H. Sasabe, K. Nakao, Y. Hayasaka and J. Kido, *ACS Appl. Mater. Interfaces*, 2017, **9**, 4742–4749; g) K. Pan, S. Li, Y. Ho, Y. Shiu, W. Isai, M. Jiao, W. Lee, C. Wu, C. Chung, T. Chatterjee, Y. Li, K. Wong, H. Hu, C. Chen and M. Lee, *Adv. Funct. Mater.*, 2016, **26**, 7560–7571; h) K. Nakao, H. Sasabe, J. Kido, *Adv. optical. Mater.*, 2017, **5**, 1600843; i) T. Serevicius, R. Skaisgiris, S. Tumkeivis and S. Jursenas, *ACS Appl. Mater. Interfaces*, 2012, **12**, 10727-10736.

# <sup>1</sup>H AND <sup>13</sup>C Spectra of compound (35CzBPym)

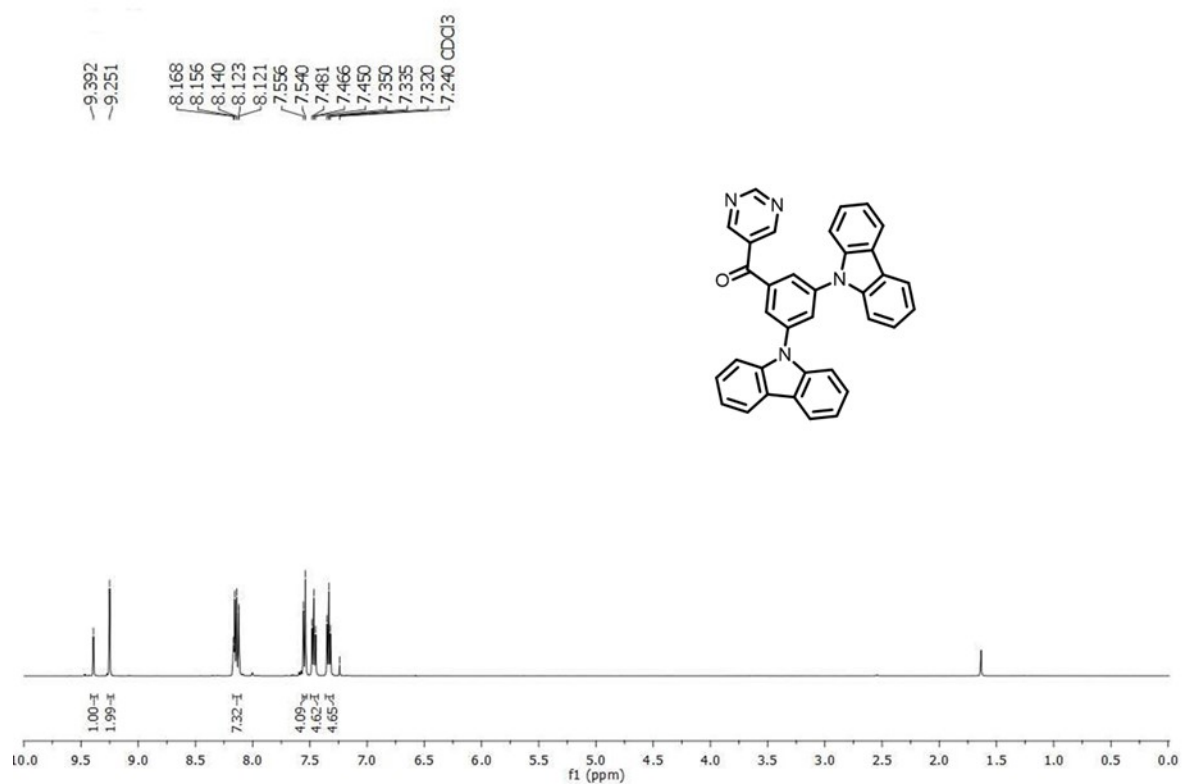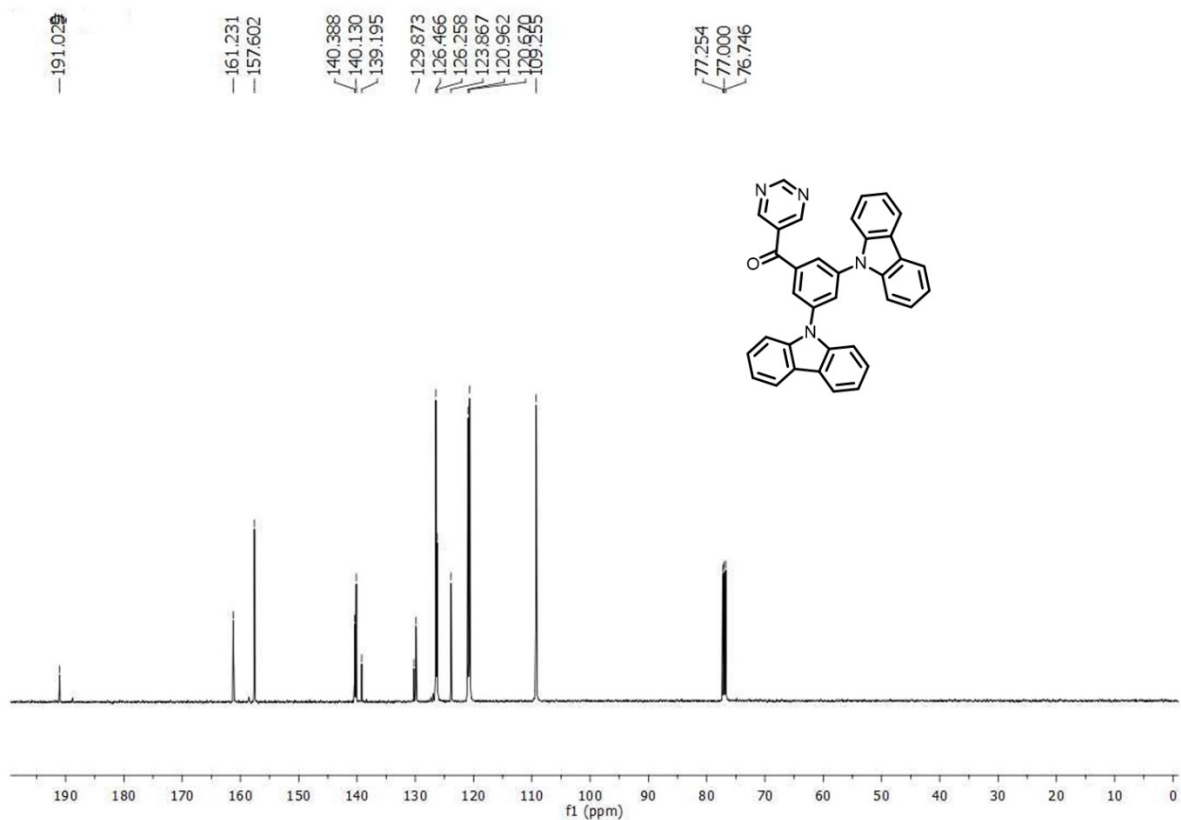

# <sup>1</sup>H AND <sup>13</sup>C Spectra of compound (35tCzBPym)

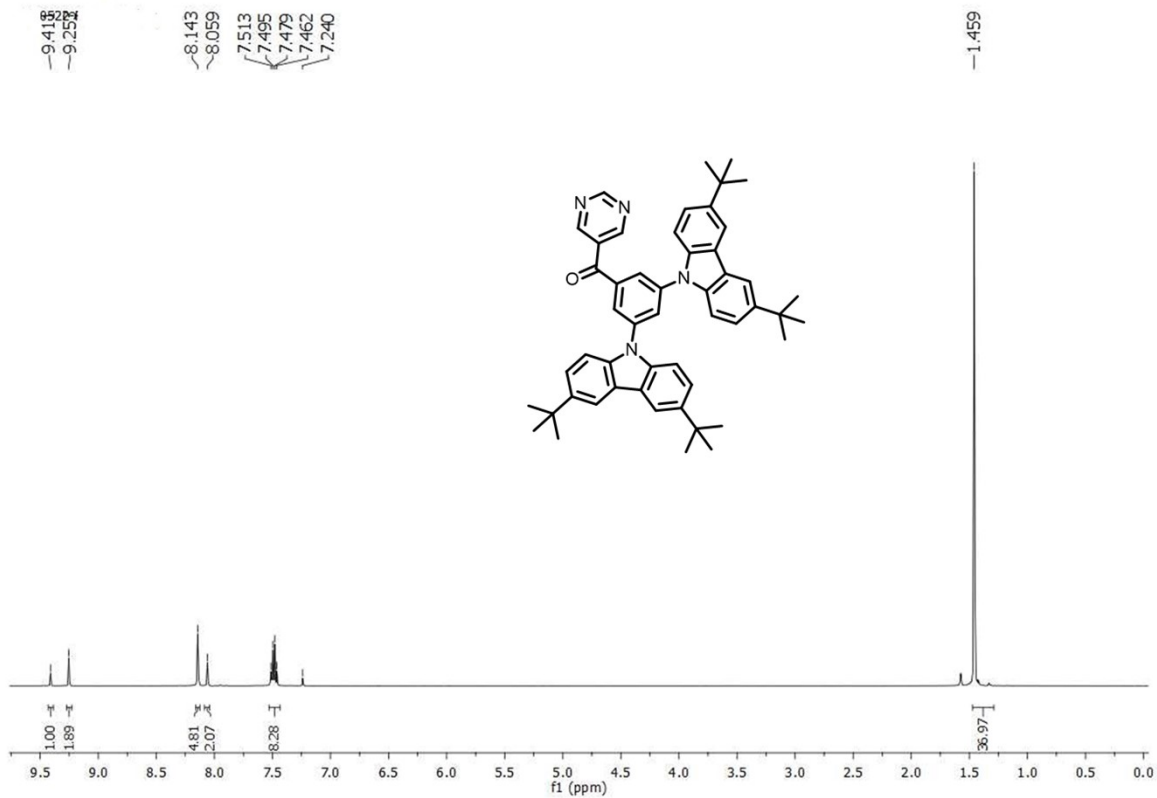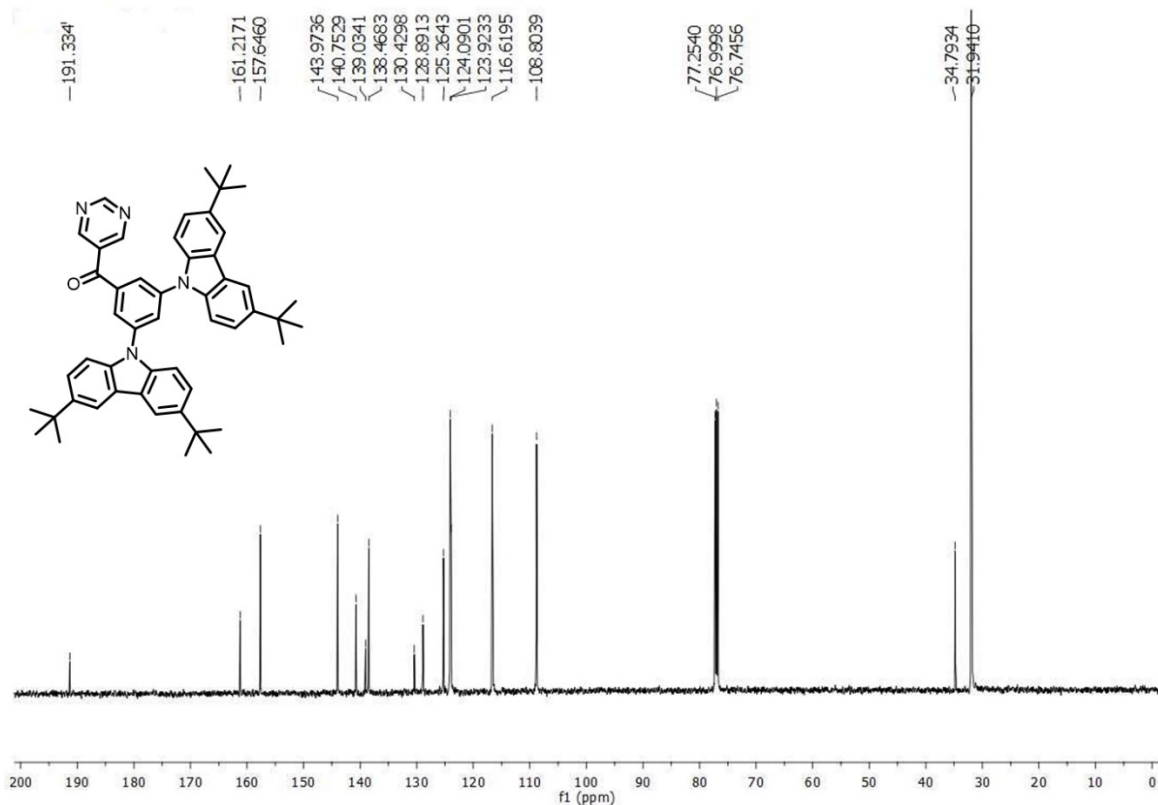

# <sup>1</sup>H AND <sup>13</sup>C Spectra of compound (25CzBPym)

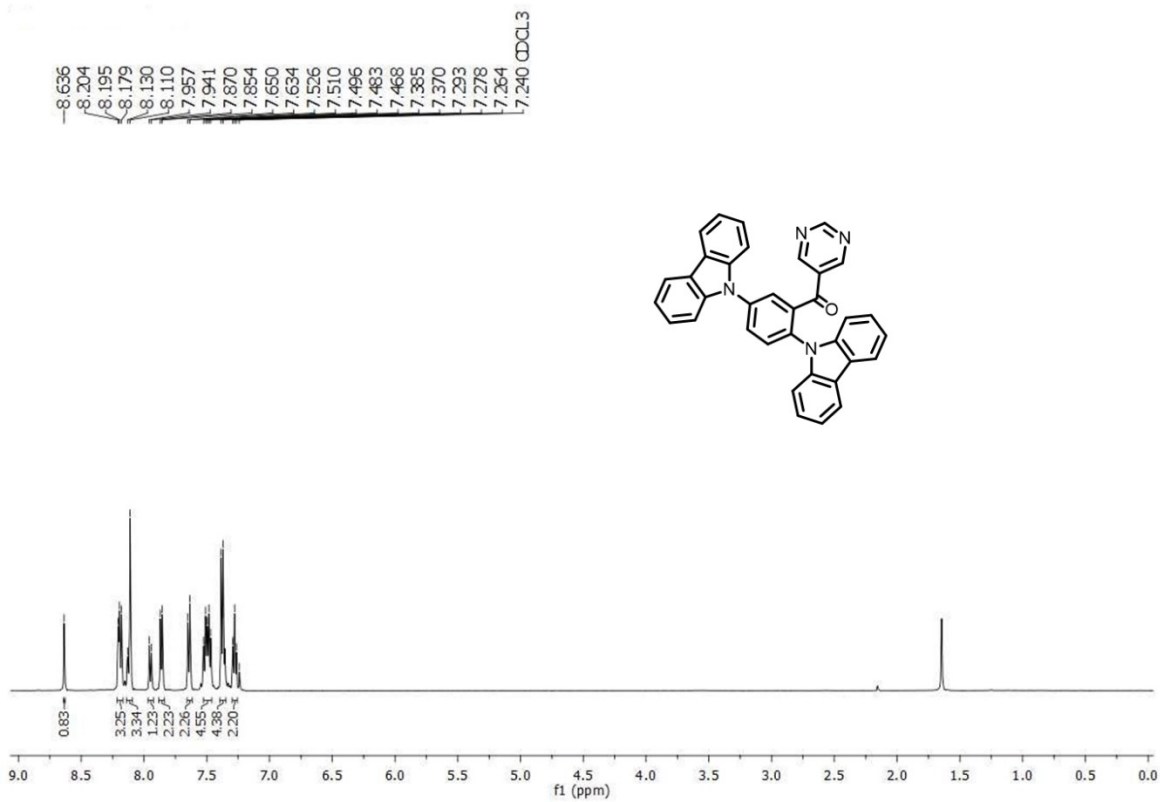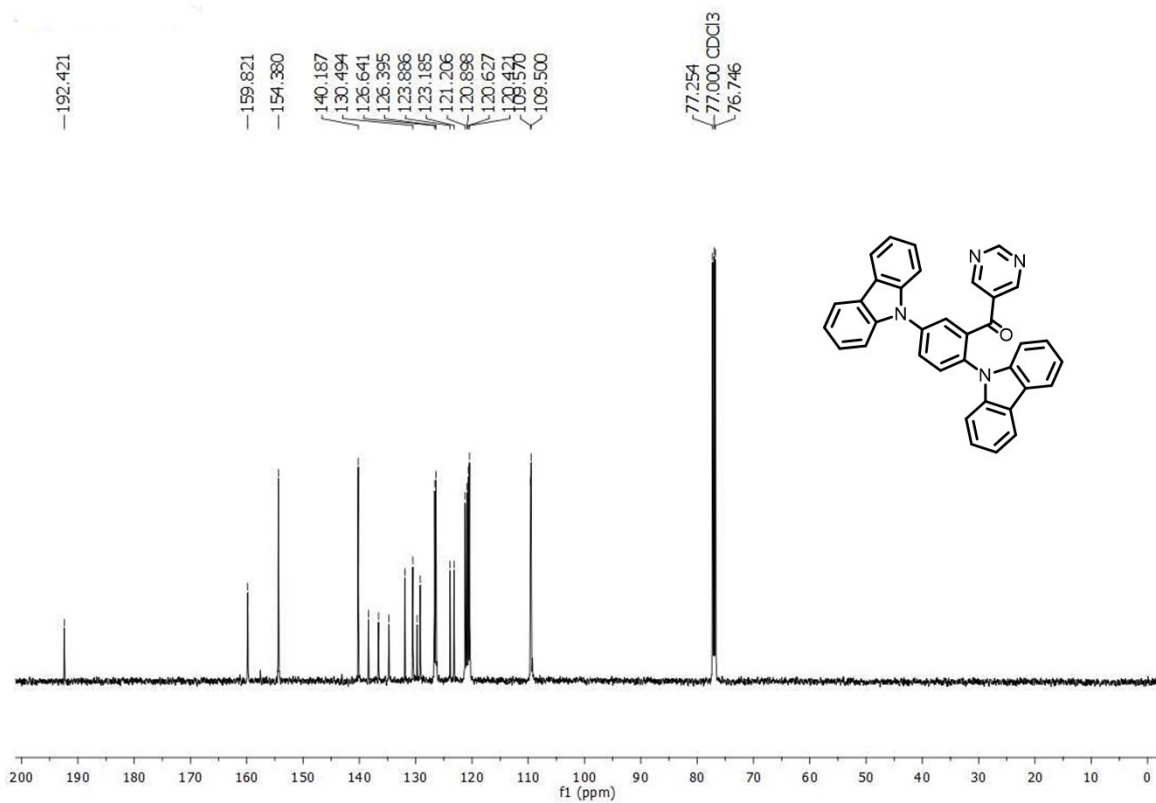

# <sup>1</sup>H AND <sup>13</sup>C Spectra of compound (25tCzBPym)

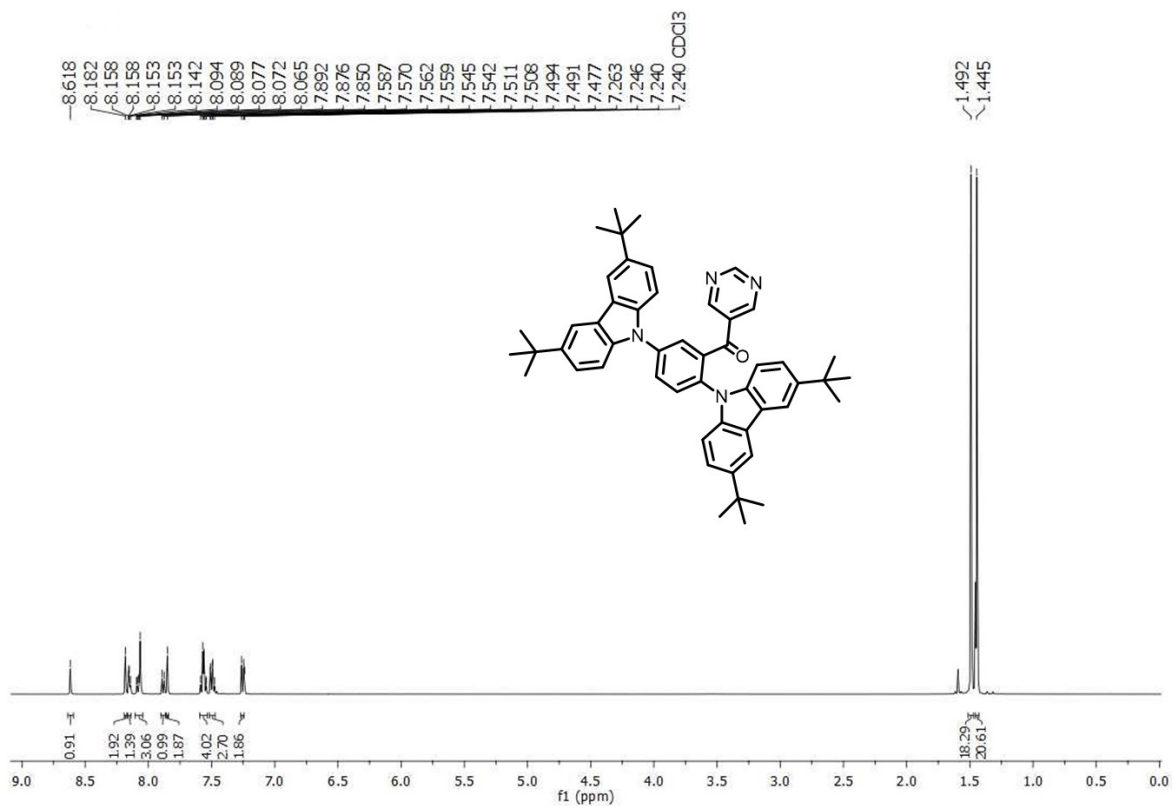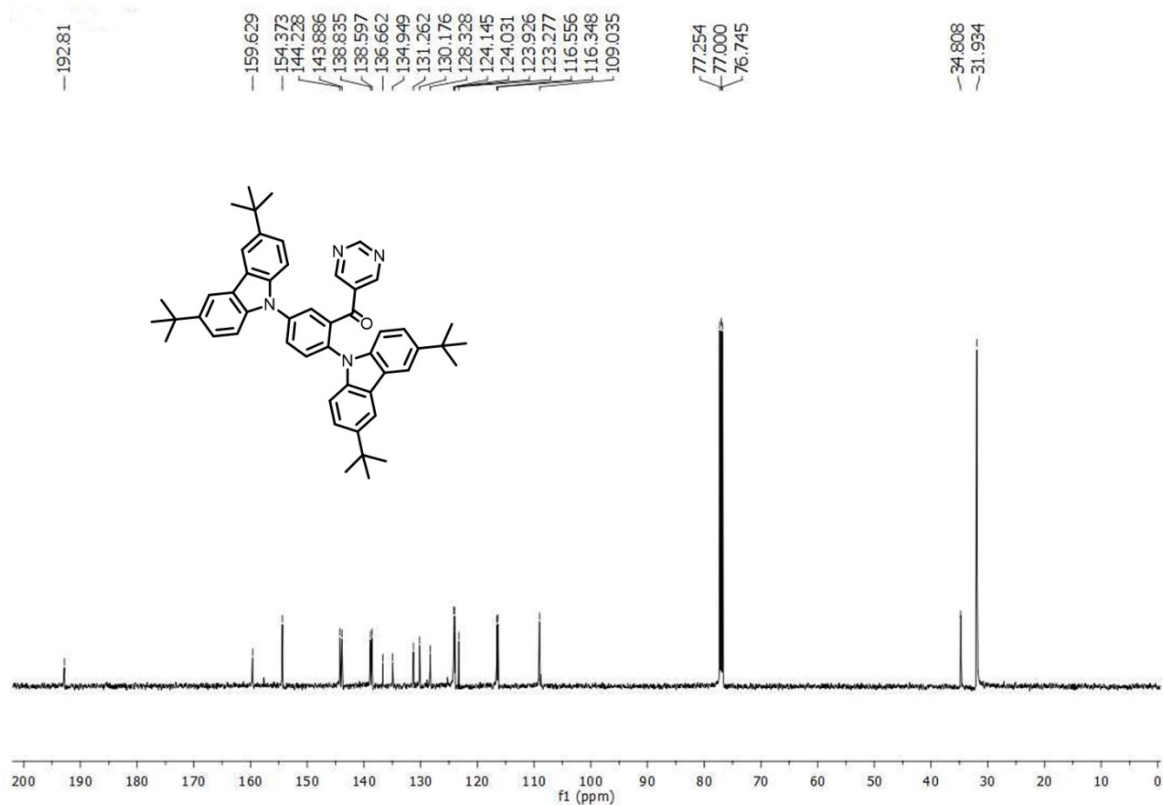

## X-Ray crystallographic analysis:

**General Crystal Growing Conditions:** X-ray quality single crystals of **35CzBPym** and **25CzBPym**, were collected from the sublimed tube after cooling down to room temperature (sublimed temperatures are 210 and 215 °C for **35CzBPym** and **25CzBPym** respectively).

ORTEP diagram of compound **35CzBPym** (CCDC = 1906824)

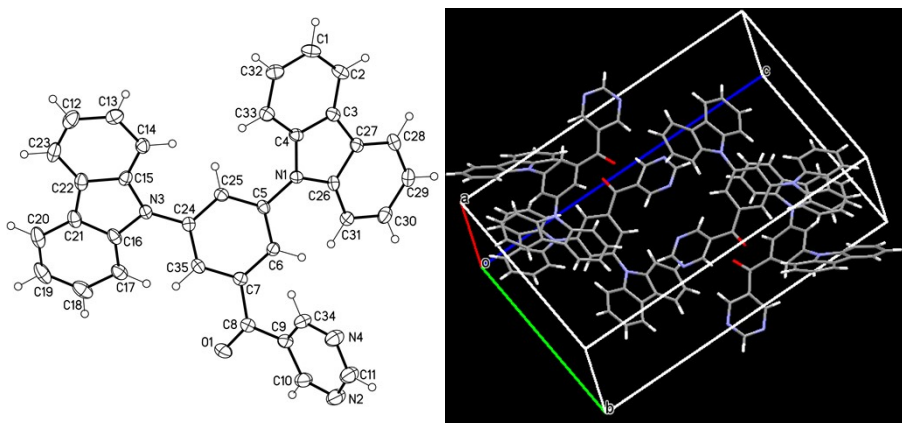

## Crystal data and structure refinement for (35CzBPym).

|                        |                          |                              |
|------------------------|--------------------------|------------------------------|
| Identification code    | 191047lt_0m              |                              |
| Empirical formula      | C35 H22 N4 O             |                              |
| Formula weight         | 514.56                   |                              |
| Temperature            | 100(2) K                 |                              |
| Wavelength             | 0.71073 Å                |                              |
| Crystal system         | Triclinic                |                              |
| Space group            | P-1                      |                              |
| Unit cell dimensions   | a = 7.8835(5) Å          | $\alpha = 89.180(3)^\circ$ . |
|                        | b = 15.0324(10) Å        | $\beta = 86.928(3)^\circ$ .  |
|                        | c = 21.3072(14) Å        | $\gamma = 83.005(3)^\circ$ . |
| Volume                 | 2502.6(3) Å <sup>3</sup> |                              |
| Z                      | 4                        |                              |
| Density (calculated)   | 1.366 Mg/m <sup>3</sup>  |                              |
| Absorption coefficient | 0.084 mm <sup>-1</sup>   |                              |

|                                   |                                             |
|-----------------------------------|---------------------------------------------|
| F(000)                            | 1072                                        |
| Crystal size                      | 0.20 x 0.15 x 0.05 mm <sup>3</sup>          |
| Theta range for data collection   | 0.957 to 26.436°.                           |
| Index ranges                      | -9<=h<=9, -18<=k<=18, -26<=l<=26            |
| Reflections collected             | 38234                                       |
| Independent reflections           | 10009 [R(int) = 0.0277]                     |
| Completeness to theta = 25.242°   | 97.7 %                                      |
| Absorption correction             | Semi-empirical from equivalents             |
| Max. and min. transmission        | 0.7454 and 0.6928                           |
| Refinement method                 | Full-matrix least-squares on F <sup>2</sup> |
| Data / restraints / parameters    | 10009 / 0 / 721                             |
| Goodness-of-fit on F <sup>2</sup> | 1.128                                       |
| Final R indices [I>2sigma(I)]     | R1 = 0.0467, wR2 = 0.1290                   |
| R indices (all data)              | R1 = 0.0649, wR2 = 0.1738                   |
| Extinction coefficient            | n/a                                         |
| Largest diff. peak and hole       | 0.545 and -0.468 e.Å <sup>-3</sup>          |

ORTEP diagram of compound **25CzBPym** (CCDC = 1906825)

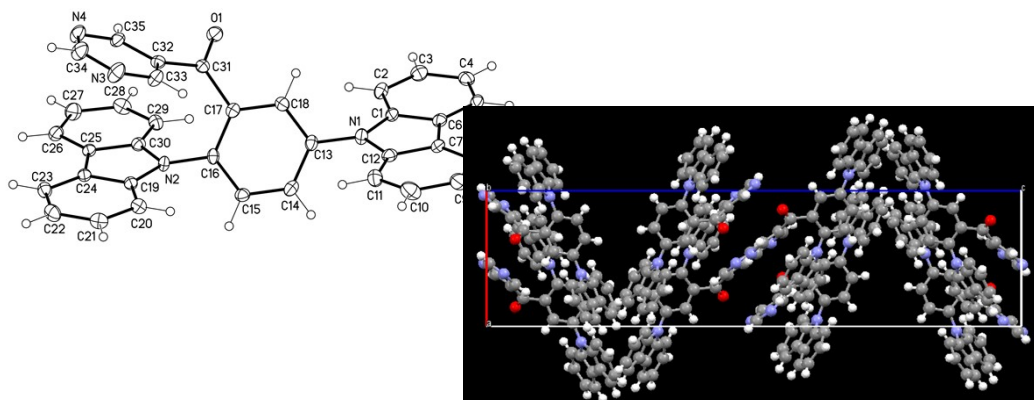

### Crystal data and structure refinement for (25CzBPym).

Identification code 180546LT\_a



|                                   |                                                  |          |
|-----------------------------------|--------------------------------------------------|----------|
| Empirical formula                 | C <sub>35</sub> H <sub>22</sub> N <sub>4</sub> O |          |
| Formula weight                    | 514.56                                           |          |
| Temperature                       | 100(2) K                                         |          |
| Wavelength                        | 0.71073 Å                                        |          |
| Crystal system                    | Orthorhombic                                     |          |
| Space group                       | P n a 21                                         |          |
| Unit cell dimensions              | a = 9.0970(3) Å                                  | α = 90°. |
|                                   | b = 15.4473(6) Å                                 | β = 90°. |
|                                   | c = 35.8227(14) Å                                | γ = 90°. |
| Volume                            | 5034.0(3) Å <sup>3</sup>                         |          |
| Z                                 | 8                                                |          |
| Density (calculated)              | 1.358 Mg/m <sup>3</sup>                          |          |
| Absorption coefficient            | 0.084 mm <sup>-1</sup>                           |          |
| F(000)                            | 2144                                             |          |
| Crystal size                      | 0.10 x 0.03 x 0.02 mm <sup>3</sup>               |          |
| Theta range for data collection   | 1.137 to 26.508°.                                |          |
| Index ranges                      | -11 ≤ h ≤ 9, -19 ≤ k ≤ 19, -44 ≤ l ≤ 44          |          |
| Reflections collected             | 46967                                            |          |
| Independent reflections           | 10371 [R(int) = 0.0371]                          |          |
| Completeness to theta = 25.242°   | 100.0 %                                          |          |
| Absorption correction             | Semi-empirical from equivalents                  |          |
| Max. and min. transmission        | 0.9485 and 0.8536                                |          |
| Refinement method                 | Full-matrix least-squares on F <sup>2</sup>      |          |
| Data / restraints / parameters    | 10371 / 1 / 721                                  |          |
| Goodness-of-fit on F <sup>2</sup> | 1.048                                            |          |
| Final R indices [I > 2σ(I)]       | R1 = 0.0377, wR2 = 0.0829                        |          |
| R indices (all data)              | R1 = 0.0518, wR2 = 0.0883                        |          |
| Absolute structure parameter      | -0.3(5)                                          |          |
| Extinction coefficient            | n/a                                              |          |
| Largest diff. peak and hole       | 0.205 and -0.224 e.Å <sup>-3</sup>               |          |

## Mass spectra of 35CzBPym

[ Mass Spectrum ]

Data : 2044 Date : 09-May-2018 16:19  
 RT : 2.18 min Scan# : 49  
 Elements : C 36/0, H 30/0, N 4/0, O 1/0  
 Mass Tolerance : 10ppm, 5mmu if m/z > 500  
 Unsaturation (U.S.) : -0.5 - 35.0

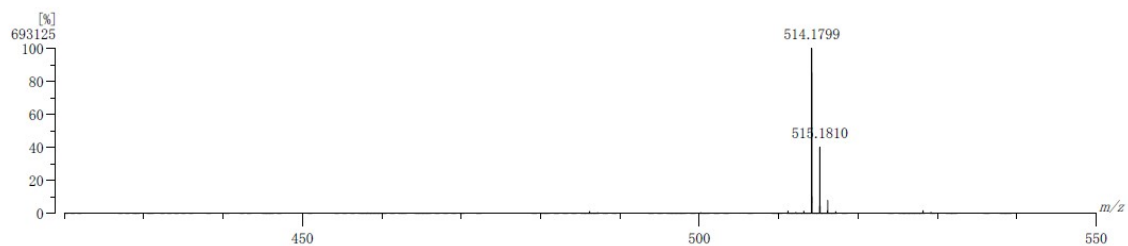

| Observed m/z | Int%   | Err [ppm / mmu] | U.S. Composition  |
|--------------|--------|-----------------|-------------------|
| 1 514.1799   | 100.00 | +1.0 / +0.5     | 27.0 C35 H22 N4 O |
| 515.1810     | 40.15  |                 |                   |

## Mass spectra of 35tCzBPym

[ Mass Spectrum ]

Data : 2051 Date : 09-May-2018 17:31  
 RT : 0.89 min Scan# : 24  
 Elements : C 52/0, H 70/0, N 4/0, O 1/0  
 Mass Tolerance : 10ppm, 5mmu if m/z > 500  
 Unsaturation (U.S.) : -0.5 - 30.0

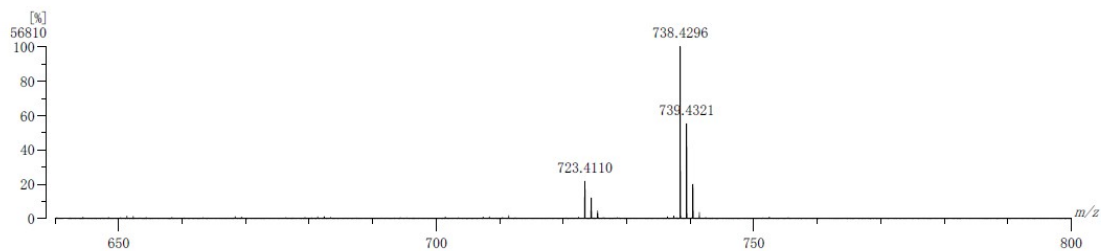

| Observed m/z | Int%   | Err [ppm / mmu] | U.S. Composition  |
|--------------|--------|-----------------|-------------------|
| 1 723.4110   | 21.73  | +6.5 / +4.7     | 27.5 C50 H51 N4 O |
| 2 738.4296   | 100.00 | -0.2 / -0.2     | 27.0 C51 H54 N4 O |
| 739.4321     | 55.25  |                 |                   |
| 740.4335     | 20.04  |                 |                   |

## Mass spectra of 25CzBPym

[ Mass Spectrum ]  
 Data : 2046 Date : 09-May-2018 16:36  
 RT : 0.09 min Scan# : 3  
 Elements : C 36/0, H 30/0, N 4/0, O 1/0  
 Mass Tolerance : 10ppm, 5mmu if m/z > 500  
 Unsaturation (U.S.) : -0.5 - 30.0

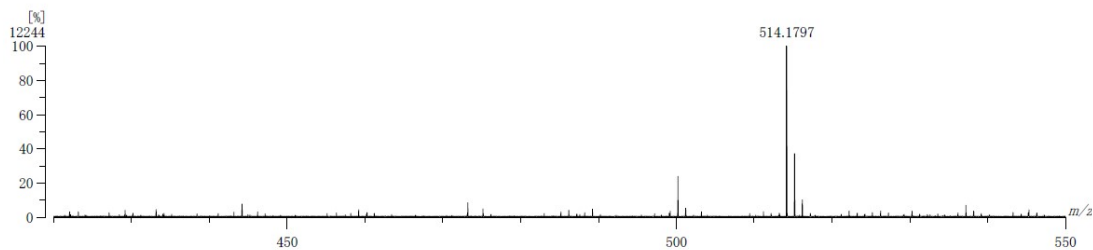

| Observed m/z | Int%   | Err[ppm / mmu] | U.S. Composition  |
|--------------|--------|----------------|-------------------|
| 1 514.1797   | 100.00 | +0.7 / +0.3    | 27.0 C35 H22 N4 O |

## Mass spectra of 25tCzBPym

[ Mass Spectrum ]  
 Data : 2050 Date : 09-May-2018 17:19  
 RT : 2.88 min Scan# : (76.90)  
 Elements : C 52/0, H 70/0, N 4/0, O 1/0  
 Mass Tolerance : 5ppm, 5mmu if m/z > 1000  
 Unsaturation (U.S.) : -0.5 - 30.0

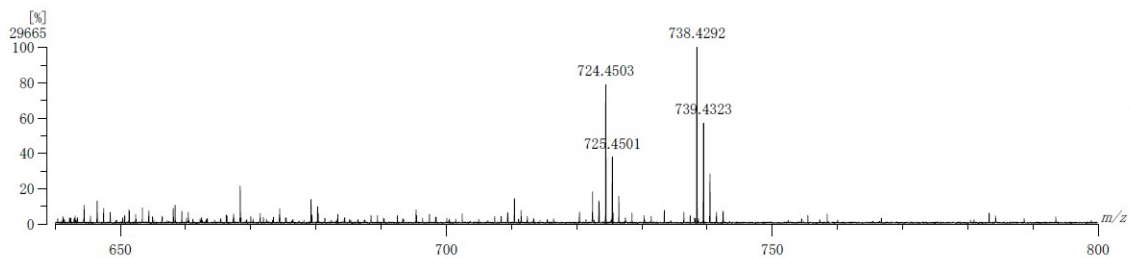

| Observed m/z | Int%   | Err[ppm / mmu] | U.S. Composition  |
|--------------|--------|----------------|-------------------|
| 1 724.4503   | 78.78  | -0.3 / -0.2    | 26.0 C51 H56 N4   |
| 2 725.4501   | 37.69  | +4.1 / +3.0    | 25.5 C52 H57 N2 O |
| 3 738.4292   | 100.00 | -0.8 / -0.6    | 27.0 C51 H54 N4 O |
| 739.4323     | 56.99  |                |                   |
